# Supplementary material
Source: HighWire-hosted journal article supplement (https://www.cmajopen.ca/highwire/filestream/89706/field_highwire_adjunct_files/0/CMAJ-22-0463_Proof_hi.pdf)
Supplement: CMAJ-22-0463_Proof_hi.pdf [file CMAJ-22-0463_Proof_hi.pdf]

## Assisted Reproductive Technologies and Pregnancy Outcomes in Alberta 2009-2014: A Population-based Study

|                               |                                                                                                                                                                                                                                                                                                                                                                                                                                                                                                                                                                                                                                                                                                                                                                                                                                                                                                                                                                                                                                                                                                                                                                                                                                                                                                                                                                                                                                                                                                                                                                                                                                                                                                                                                                                                                          |
|-------------------------------|--------------------------------------------------------------------------------------------------------------------------------------------------------------------------------------------------------------------------------------------------------------------------------------------------------------------------------------------------------------------------------------------------------------------------------------------------------------------------------------------------------------------------------------------------------------------------------------------------------------------------------------------------------------------------------------------------------------------------------------------------------------------------------------------------------------------------------------------------------------------------------------------------------------------------------------------------------------------------------------------------------------------------------------------------------------------------------------------------------------------------------------------------------------------------------------------------------------------------------------------------------------------------------------------------------------------------------------------------------------------------------------------------------------------------------------------------------------------------------------------------------------------------------------------------------------------------------------------------------------------------------------------------------------------------------------------------------------------------------------------------------------------------------------------------------------------------|
| Journal:                      | CMAJ                                                                                                                                                                                                                                                                                                                                                                                                                                                                                                                                                                                                                                                                                                                                                                                                                                                                                                                                                                                                                                                                                                                                                                                                                                                                                                                                                                                                                                                                                                                                                                                                                                                                                                                                                                                                                     |
| Manuscript ID                 | CMAJ-22-0463                                                                                                                                                                                                                                                                                                                                                                                                                                                                                                                                                                                                                                                                                                                                                                                                                                                                                                                                                                                                                                                                                                                                                                                                                                                                                                                                                                                                                                                                                                                                                                                                                                                                                                                                                                                                             |
| Manuscript Type:              | Research - Cohort study (retrospective)                                                                                                                                                                                                                                                                                                                                                                                                                                                                                                                                                                                                                                                                                                                                                                                                                                                                                                                                                                                                                                                                                                                                                                                                                                                                                                                                                                                                                                                                                                                                                                                                                                                                                                                                                                                  |
| Date Submitted by the Author: | 22-Mar-2022                                                                                                                                                                                                                                                                                                                                                                                                                                                                                                                                                                                                                                                                                                                                                                                                                                                                                                                                                                                                                                                                                                                                                                                                                                                                                                                                                                                                                                                                                                                                                                                                                                                                                                                                                                                                              |
| Complete List of Authors:     | Moore, Linn ; Canadian Vigour Centre; University of Alberta Faculty of Medicine & Dentistry<br>Haijhosseini, Morteza ; Canadian Vigour Centre; University of Alberta, School of Public Health<br>Motan, Tarek ; University of Alberta Faculty of Medicine & Dentistry, Department of Obstetrics and Gynecology<br>Kaul, Padma; Canadian Vigour Centre; University of Alberta Faculty of Medicine & Dentistry                                                                                                                                                                                                                                                                                                                                                                                                                                                                                                                                                                                                                                                                                                                                                                                                                                                                                                                                                                                                                                                                                                                                                                                                                                                                                                                                                                                                             |
| Keywords:                     | Reproductive Health                                                                                                                                                                                                                                                                                                                                                                                                                                                                                                                                                                                                                                                                                                                                                                                                                                                                                                                                                                                                                                                                                                                                                                                                                                                                                                                                                                                                                                                                                                                                                                                                                                                                                                                                                                                                      |
| More Detailed Keywords:       | reproductive assisted technologies, pregnancy, infertility                                                                                                                                                                                                                                                                                                                                                                                                                                                                                                                                                                                                                                                                                                                                                                                                                                                                                                                                                                                                                                                                                                                                                                                                                                                                                                                                                                                                                                                                                                                                                                                                                                                                                                                                                               |
| Abstract:                     | <p><b>Objectives:</b> The purpose of this study is to describe the trends in assisted reproductive technologies (ART) in Alberta and evaluate the impact of ART on perinatal outcomes in a large population-based cohort.</p> <p><b>Methods:</b> Maternal and child administrative data for all live-births occurring July 1, 2009-December 31, 2014 in Alberta, Canada, were linked and included in this retrospective study. ART pregnancies were identified from pharmaceutical claims or ICD-10 codes. Main outcome measures: Incidence and temporal trends of live-births in ART pregnancies. Maternal characteristics and perinatal outcomes were evaluated as ART vs non-ART pregnancies and categorised by maternal age group.</p> <p><b>Results:</b> Of the 277,847 live-births between 1 July 2009 and 31 December 2014, 11,258 (4.1%) were conceived with ART therapies. The incidence of ART pregnancies increased from 28.4 to 43.8 per 1000 pregnancies. The number of women aged 30-35 and &gt;35 years delivering following ART increased over time (30-35 years: 33.4 to 48.7 per 1000 pregnancies; &gt;35 years: 76.5 to 97.5 per 1000 pregnancies). Women who underwent ART were older with higher rates of pre-existing and pregnancy-related conditions. Newborns of ART pregnancies were more likely delivered via C-section (49.1 vs 27.6%, <math>p&lt;0.001</math>) and smaller than non-ART newborns (low birth weight: 14.8 vs 5.1%, <math>p&lt;0.001</math>). Notably, there was no increased risk of adverse anomalies in the newborns.</p> <p><b>Conclusion:</b> The incidence of live-births following ART pregnancies in Alberta, Canada, is 4.1% and is increasing by approximately 0.31% per year. Newborns following ART appear smaller at birth but show no signs of poor health.</p> |

1  
2  
3  
4  
5  
6  
7  
8  
9  
10  
11  
12  
13  
14  
15  
16  
17  
18  
19  
20  
21  
22  
23  
24  
25  
26  
27  
28  
29  
30  
31  
32  
33  
34  
35  
36  
37  
38  
39  
40  
41  
42  
43  
44  
45  
46  
47  
48  
49  
50  
51  
52  
53  
54  
55  
56  
57  
58  
59  
60

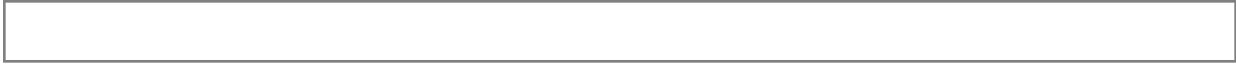

SCHOLARONE™  
Manuscripts

1  
2  
3 **Assisted Reproductive Technologies and Pregnancy Outcomes in Alberta 2009-2014: A Population-**  
4 **based Study**  
5  
6

7  
8 Running title: ART in Alberta  
9

10 Linn E. Moore, PhD<sup>a</sup>, Morteza Haijhosseini, PhD<sup>a,c</sup>, Tarek Motan, MB, ChB<sup>b</sup>, Padma Kaul, PhD<sup>a</sup>  
11  
12

13 <sup>a</sup>Canadian VIGOUR Centre, University of Alberta, Edmonton, Alberta, Canada  
14  
15

16 <sup>b</sup>Department of Obstetrics and Gynecology, University of Alberta, Edmonton, Alberta, Canada  
17  
18

19 <sup>c</sup>School of Public Health, University of Alberta, Edmonton, Alberta, Canada  
20  
21

22  
23  
24 Word count: 2186  
25  
26

27 Corresponding author:  
28  
29

30 Dr. Padma Kaul  
31  
32

33 4-120 Katz Group Centre for Pharmacy and Health Research  
34  
35

36 University of Alberta  
37  
38

39 Edmonton, AB  
40  
41

42 Canada, T6G 2E1  
43  
44

45 Phone: +1-780-492-1140  
46  
47

48 Email: [pkaul@ualberta.ca](mailto:pkaul@ualberta.ca)  
49  
50

51 **Funding:** No funding was received for conducting this study.  
52

53 **Conflicts of interest/Competing interests:** The authors have no conflicts of interests of disclosures to  
54 declare.  
55  
56  
57  
58  
59  
60

## Abstract

**Objectives:** The purpose of this study is to describe the trends in assisted reproductive technologies (ART) in Alberta and evaluate the impact of ART on perinatal outcomes in a large population-based cohort.

**Methods:** Maternal and child administrative data for all live-births occurring July 1, 2009-December 31, 2014 in Alberta, Canada, were linked and included in this retrospective study. ART pregnancies were identified from pharmaceutical claims or ICD-10 codes. Main outcome measures: Incidence and temporal trends of live-births in ART pregnancies. Maternal characteristics and perinatal outcomes were evaluated as ART vs non-ART pregnancies and categorised by maternal age group.

**Results:** Of the 277,847 live-births between 1 July 2009 and 31 December 2014, 11,258 (4.1%) were conceived with ART therapies. The incidence of ART pregnancies increased from 28.4 to 43.8 per 1000 pregnancies. The number of women aged 30-35 and >35 years delivering following ART increased over time (30-35 years: 33.4 to 48.7 per 1000 pregnancies; >35 years: 76.5 to 97.5 per 1000 pregnancies). Women who underwent ART were older with higher rates of pre-existing and pregnancy-related conditions. Newborns of ART pregnancies were more likely delivered via C-section (49.1 vs 27.6%,  $p<0.001$ ) and smaller than non-ART newborns (low birth weight: 14.8 vs 5.1%,  $p<0.001$ ). Notably, there was no increased risk of adverse anomalies in the newborns.

**Conclusion:** The incidence of live-births following ART pregnancies in Alberta, Canada, is 4.1% and is increasing by approximately 0.31% per year. Newborns following ART appear smaller at birth but show no signs of poor health.

**Key words:** reproductive assisted technologies, ART, infertility, pregnancy

## Introduction

Infertility, defined as failure to conceive despite frequent sexual intercourse without the use of contraceptive measures for twelve months, affects up to 1 in 6 Canadian couples.<sup>1</sup> The risk of infertility increases with advancing maternal age, and while infertility is sometimes unexplained, it often stems from underlying medical conditions. Assisted reproductive technologies (ART) is an umbrella term for medical interventions aiming to improve fertility and includes techniques where eggs or sperm are manipulated outside of the body such as in vitro fertilization (IVF). In Canada, ART also includes ovulation induction and intrauterine insemination.<sup>1</sup> Previous studies have found that ART pregnancies are associated with a higher risk of unfavorable outcomes including high rates of multiple births<sup>2,3</sup>, low birth weights<sup>2,4,5</sup>, premature births<sup>2,4,5</sup>, and increased maternal morbidity and mortality<sup>2,6</sup>.

In Canada, pregnant women have access to universal healthcare, and despite ART not being publicly funded in all provinces, the number of ART cycles resulting in live births are comparatively high.<sup>7</sup> With increasing success rates, large population-based studies evaluating the health outcomes in ART pregnancies in Canada are needed. In this retrospective study, we evaluated temporal trends, socio-demographic, and clinical characteristics of all women with live births following ART and non-ART in the province of Alberta, Canada over the last decade. We also compared obstetric and neonatal outcomes between ART pregnancies and naturally conceived pregnancies, overall and across maternal age groups.

## Materials and methods

Ethical approval was received from the University of Alberta Research Ethics Board (Pro00056999). The study was performed in accordance with the ethical standards as laid down in the 1964 Declaration of Helsinki. Due to the retrospective and unidentifiable nature of the data, informed consent from individuals was not required.

### *Data linkage and population*

1  
2  
3 This is a retrospective, population-level study using data received from the Province of Alberta Ministry  
4 of Health (Alberta Health). The study is based on data from the longitudinal Alberta Pregnancy-Birth  
5 cohort, which has been previously described.<sup>8,9</sup> Briefly, maternal inpatient data, ambulatory records,  
6 physician claims, pharmaceutical claims data, and laboratory data, were linked to the offspring records  
7 via the birth registry. Women giving birth to a live offspring following ART treatment<sup>1</sup> were identified as  
8 either those with prescriptions filled with pharmaceutical agents known to increase fertility  
9 (Supplementary Table S1) or as those who had an International Classification of Disease (ICD) 9<sup>th</sup> or 10<sup>th</sup>  
10 revision (Supplementary Table S2) code for ART treatment in any diagnostic field of their inpatient,  
11 outpatient clinic, or physician office visit records within six-months prior to or during the pregnancy. All  
12 other women were classified as non-ART. Pharmaceutical data became available for research as of April  
13 1, 2008, allowing for adequate capture prior to conception. The current cohort was restricted to women  
14 giving birth between July 1, 2009 to December 31, 2014. Women residing outside of Alberta at the time  
15 of delivery, under the age of 14 or over the age of 54, and with missing or incorrect dates were excluded  
16 from the study.  
17  
18  
19  
20  
21  
22  
23  
24  
25  
26  
27  
28  
29  
30  
31

### 32 33 *Clinical and demographical data* 34 35

36 Maternal age at delivery was obtained from the population registry. Previously validated naming  
37 algorithms were used to identify women of South-Asian or Chinese ethnicity.<sup>10,11</sup> All other women were  
38 categorized as general population, which in Alberta at the time of the study was comprised largely of  
39 Caucasians. The vital statistics birth registry provided information on maternal marital status (married or  
40 not married). Annual household income was obtained at the neighbourhood level by linking residential  
41 postal codes of the mother to Statistics Canada 2006 census data. Pre-existing conditions of the mother,  
42 such as diabetes, cardiovascular disease, chronic obstructive pulmonary disease, asthma, renal failure,  
43 liver disease, epilepsy, and lupus, were identified using ICD codes (Supplementary Table S3) from the  
44 delivery hospitalization, any previous hospitalization, or ambulatory records as of April 1, 1997.  
45  
46  
47  
48  
49  
50  
51  
52  
53  
54  
55  
56  
57  
58  
59  
60

1  
2  
3 Gestational diabetes and hypertensive disorders of pregnancy (including preeclampsia and eclampsia)  
4  
5 were identified using ICD codes from the delivery hospitalization records (Supplementary Table S3).  
6  
7

8           Obstetrical delivery was classified as spontaneous vaginal birth, induction of labour, and/or  
9  
10 Caesarean section from the delivery hospitalization records. The Vital Status Birth records were used to  
11  
12 access information on birth weights and the delivery hospitalization records for length of neonatal  
13  
14 intensive care unit (NICU) stay, when applicable. Congenital anomalies were identified according to  
15  
16 ICD9 and ICD10 codes (Supplementary Table S4) from the delivery hospitalization.  
17  
18

### 19 *Statistical analysis*

20  
21  
22 The incidence of ART pregnancies was calculated by dividing the number of ART pregnancies by the  
23  
24 total number of pregnancies for each birth year and reported ART pregnancies per 1000 pregnancies.  
25

26 Frequency tables were created for each maternal age category. Distribution of maternal characteristics and  
27  
28 obstetrical/neonatal outcomes were compared between women with and without ART pregnancies using  
29  
30 Pearson chi-square test and independent t-test for categorical and continuous variables, respectively. The  
31  
32 unit of analysis for maternal characteristics was the pregnancy and the unit of analysis for obstetrical and  
33  
34 neonatal outcomes was the live birth events. All analyses were performed using R version 3.5.0.  
35  
36

### 37 **Results**

38  
39  
40 There were 286,183 live births in Alberta between July 1, 2009 and December 31, 2014. After excluding  
41  
42 8268 (2.9%) live births of women not residing in Alberta at the time of delivery, 17 (0.00006%) live  
43  
44 births to mothers at the age of less than 14 years or over 54 years, and 50 (0.0002%) births with missing  
45  
46 or incorrect dates, a total of 277,847 live births remained. Of these 11,258 (4.1%) pregnancies were  
47  
48 classified as the ART cohort and the remaining 266,589 (95.9%) live births constituted the non-ART  
49  
50 cohort (Figure 1). The incidence of live births with ART increased from 28.4 per 1000 pregnancies in  
51  
52 2009 to 43.8 per 1000 pregnancies in 2014 (Figure 2), resulting in a 0.31% (95%CI: 0.28%, 0.34%,  
53  
54 p<0.001) increase per year in newborns following ART pregnancies. When stratified by maternal age  
55  
56  
57  
58  
59  
60

1  
2  
3 group, the temporal trends in live births following ART showed an increase across all groups. The highest  
4 proportion of newborns following ART were in women aged 30-35 years or in women 35 years and older  
5  
6 (Figure 3).  
7  
8  
9

10 Compared to women giving birth following pregnancies without ART treatment, women  
11 undergoing ART treatment were older (33.4 vs 29.2 years,  $p<0.001$ ), more likely to be married (79.2 vs  
12 69.3%,  $p<0.001$ ), more often primiparous (62.8 vs 53.3%,  $p<0.001$ ), delivered more twins (11.0 vs 1.3%)  
13 and triplets (0.4 vs 0.02,  $p<0.001$ ), and lived in urban areas (89.8 vs 83.5%,  $p<0.001$ , Table 1). There  
14 were no differences in median household income or large differences in ethnic backgrounds between  
15 ART and non-ART cohorts. Women who underwent ART treatment had higher rates of pregnancy  
16 disorders such as gestational diabetes (11.0 vs 7.2%,  $p<0.001$ ) and hypertensive disorders of pregnancy  
17 (9.4 vs 6.4%,  $p<0.001$ ) and pre-existing conditions including diabetes (1.7 vs 1.0,  $p<0.001$ ) and  
18 cardiovascular disease (1.4% vs 1.1%,  $p=0.003$ ). Rates of composite pre-existing conditions, including  
19 chronic obstructive pulmonary disease, asthma, renal failure, liver disease, epilepsy, and lupus were  
20 similar between ART and non-ART cohorts.  
21  
22  
23  
24  
25  
26  
27  
28  
29  
30  
31  
32  
33

34 C-section rates were higher in ART pregnancies than non-ART pregnancies (41.9 vs 27.6%,  
35  $p<0.001$ ) and there was a higher incidence of ART conceived newborns with a body weight of less than  
36 2500 grams (14.8 vs 5.1%,  $p<0.001$ , Table 2). Admission to NICU immediately following birth was about  
37 twice as frequent among neonates conceived following ART compared to non-ART pregnancies (27.8 vs  
38 15.8%,  $p<0.001$ ). Crucially, there were no differences in the rate of congenital anomalies between  
39 newborns in the ART and non-ART cohorts (0.49 vs 0.43%,  $p=0.466$ ).  
40  
41  
42  
43  
44  
45  
46

47 The highest incidence of twin pregnancies was among women who had undergone ART  
48 treatment and were over 30 years of age (Table 3). These groups also showed the highest rates of C-  
49 section (Table 4). Conversely, younger women (<25 years) with ART had the proportionally highest rates  
50 of pre-term delivery (ART vs non-ART: 21.8 vs 6.0%) and newborns at low birth weights (ART vs non-  
51 ART: 17.0 vs 5.0% of babies born at <2.5kg) (Table 4).  
52  
53  
54  
55  
56  
57  
58  
59  
60



## Discussion

This retrospective population-based study of all live-birth deliveries in Alberta, Canada, between July 2009 and December 2014 found that 4.1% of live-births were following ART, while the incidence of ART pregnancies resulting in live-births increased by 0.31% per year over the study period. Women in the ART cohort were on average older and had higher rates of pre-existing and pregnancy-related conditions compared to the non-ART cohort. Newborns following ART conceptions were more likely to be multiples, have low birth weight, and born preterm, while the presence of congenital anomalies were similar between ART and non-ART cohorts.

Reports to date on the outcomes of ART treatments leading to live births in Canada have shown varied results. At the time of the current study, the annual CARTR report from 2012 recorded 5971 live births in Canada following ART that year.<sup>12</sup> Based on data from Statistics Canada from 2012<sup>13</sup>, this would have constituted only 1.5% of all live births. In contrast to this low number, a 2013 prospective study from Calgary, Alberta containing data on 1564 pregnant women, reported that 5.9% were conceived following ART.<sup>14</sup> These large differences in rates of live births following ART may be in part due to incomplete reporting, reporting bias, or differences in the definition of ART. Similarly, in the United States, reports of the number of procedures performed, techniques used, and outcomes disclosed to the National ART Surveillance System (NASS), only includes procedures where one or more embryos are transferred but does not include ovulation induction or artificial insemination.<sup>15</sup> As such, the overall rate from the most recent NASS report with data from 2015/2016 indicates that only 1.8% of babies born in the United States are from ART pregnancies<sup>15</sup>, which is lower than what has been reported in other contemporary American studies.<sup>16</sup> Our population-based study used data from all live births from a defined geographical area with universal healthcare between July 2009 and December 2014. Our finding of an overall rate of 4.1% of newborns following ART likely reflects a more accurate incidence of ART births in a North American population.

1  
2  
3 Similar to previous studies<sup>2-5</sup>, we found that women undergoing ART had increased rates of  
4 pregnancy complications, multiple births, and obstetric interventions. Newborns following ART were  
5 more often premature and had lower birth weights than non-ART conceptions. However, contrary to what  
6 has been reported previously<sup>17</sup>, we did not see increased rates of congenital anomalies in the neonates  
7 following ART. It has been suggested that the increased risk of birth defects following ART may be more  
8 strongly linked to the etiology of infertility rather than the ART medications.<sup>17-19</sup> As such, subfertility,  
9 which is when couples conceive without the use of ART after more than a year of not being able to  
10 conceive, could be a confounding factor that could not be adjusted for in the current analysis. It may  
11 partly explain why we did not find increased rates of congenital anomalies in our ART cohort. The  
12 current study only assessed outcomes reported during the delivery hospitalization. Any anomalies  
13 reported beyond the delivery hospitalization were not captured in the current analysis.  
14  
15  
16  
17  
18  
19  
20  
21  
22  
23  
24  
25  
26

27 An unexpected finding in the current study was the comparatively high rates of preterm births and  
28 low birth weight newborns among young mothers (<25 years) with ART. While numerous studies have  
29 assessed the impact of advanced maternal age on perinatal outcomes both after conceiving spontaneously  
30 and following ART<sup>20, 21</sup>, little is known about why newborns of younger women with ART may be at  
31 increased risk of adverse perinatal outcomes when compared to mothers of advanced age. It can be  
32 speculated that the etiology of infertility among women under the age of 25 undergoing ART is different  
33 to that of older women undergoing ART because of delayed childbearing. For example, polycystic  
34 ovarian syndrome (PCOS) is a cause of infertility among young women<sup>22</sup> and has been associated with  
35 poorer obstetric and perinatal outcomes.<sup>23</sup> While the underlying infertility diagnosis was beyond the scope  
36 of the current study, aetiologies such as PCOS in younger women may explain why this group had poorer  
37 perinatal outcomes compared to those of higher ages or non-ART women. Further studies are needed to  
38 confirm these findings and the reasons behind them. The incidence of live births amongst women 30  
39 years and older increased over the span of the study, but increasing maternal age was not associated with  
40 increased maternal or perinatal health risks beyond what would be expected for non-ART women in the  
41  
42  
43  
44  
45  
46  
47  
48  
49  
50  
51  
52  
53  
54  
55  
56  
57  
58  
59  
60

1  
2  
3 same age-groups. This finding supports previous population-level research from Sweden looking  
4 specifically at pregnancy outcomes among women of advanced age with and without ART treatment.<sup>20</sup>  
5  
6

7  
8 Although the current study utilized data from a large population-based cohort, it is limited by the  
9 lack of some key data, such as maternal weight and paternal fertility. As the data linkage in the current  
10 study was via the birth registry, only live births were included with no information on ART success rates  
11 or trends in overall use of ART could be evaluated.  
12  
13  
14  
15

## 16 17 **Conclusions**

18  
19 In summary, the incidence of live births following ART in Alberta, Canada is 4.1% and is increasing over  
20 time. Women who had ART have higher rates of pregnancy complications, while newborns following  
21 ART are more often preterm and have a low birth weight. In this population-level contemporary study, we  
22 did not see signs of increased risk of congenital anomalies following ART.  
23  
24  
25  
26  
27  
28  
29  
30

31 **Acknowledgements:** This study is based in part on data provided by Alberta Health. The interpretation  
32 and conclusions contained herein are those of the researchers and do not necessarily represent the views  
33 of the Government of Alberta. Neither the Government nor Alberta Health express any opinion in relation  
34 to this study. We thank the Customer Relationship and Data Access Unit at Alberta Health for creating  
35 the linked cohort.  
36  
37  
38  
39  
40  
41

42 **Availability of data and material:** The data underlying this article was provided by the Government of  
43 Alberta under the terms of a research agreement. Inquiries respecting access to the data can be made  
44 to [health.resdata@gov.ab.ca](mailto:health.resdata@gov.ab.ca).  
45  
46  
47

48 **Authors' contributions:** All authors contributed to the study conception and design. Data analysis were  
49 performed by MH and results were discussed and interpreted by all authors. The first draft of the  
50 manuscript was written by LM and all authors commented on previous versions of the manuscript. TM  
51  
52  
53  
54  
55  
56  
57  
58  
59  
60

1  
2  
3  
4  
5  
6  
7  
8  
9  
10  
11  
12  
13  
14  
15  
16  
17  
18  
19  
20  
21  
22  
23  
24  
25  
26  
27  
28  
29  
30  
31  
32  
33  
34  
35  
36  
37  
38  
39  
40  
41  
42  
43  
44  
45  
46  
47  
48  
49  
50  
51  
52  
53  
54  
55  
56  
57  
58  
59  
60

provided content expertise. PK provided methodological expertise. All authors read and approved the final manuscript.

Confidential

## References

1. Government of Canada. Available at <https://www.canada.ca/en/public-health/services/fertility/fertility.html>. Accessed 2020-07-06.
2. Zhu L, Zhang Y, Liu Y, et al. Maternal and Live-birth Outcomes of Pregnancies following Assisted Reproductive Technology: A Retrospective Cohort Study. *Sci Rep* 2016;**6**:35141. doi:10.1038/srep35141.
3. Kulkarni AD, Jamieson DJ, Jones Jr. HW, et al. Fertility treatments and multiple births in the United States. *N Engl J Med* 2013;**369**:2218-25. doi:10.1056/NEJMoal301467.
4. Henningsen AK, Pinborg A, Lidegaard O, et al. Perinatal outcome of singleton siblings born after assisted reproductive technology and spontaneous conception: Danish national sibling-cohort study. *Fertil Steril* 2011;**95**:959-63. doi:10.1016/j.fertnstert.2010.07.1075.
5. Declercq E, Luke B, Belanoff C, et al. Perinatal outcomes associated with assisted reproductive technology: the Massachusetts Outcomes Study of Assisted Reproductive Technologies (MOSART). *Fertil Steril* 2015;**103**:888-95. doi:10.1016/j.fertnstert.2014.12.119.
6. Dayan N, Joseph KS, Fell DB, et al. Infertility treatment and risk of severe maternal morbidity: a propensity score-matched cohort study. *CMAJ* 2019;**191**:E118-E27. doi:10.1503/cmaj.181124.
7. Gunby J, Bissonnette F, Librach C, et al. Assisted reproductive technologies (ART) in Canada: 2007 results from the Canadian ART Register. *Fertil Steril* 2011;**95**:542-7 e1-10. doi:10.1016/j.fertnstert.2010.05.057.
8. Chatur S, Islam S, Moore LE, et al. Incidence of Syncope During Pregnancy: Temporal Trends and Outcomes. *J Am Heart Assoc* 2019;**8**:e011608. doi:10.1161/JAHA.118.011608.
9. Bowker SL, Savu A, Yeung RO, et al. Patterns of glucose-lowering therapies and neonatal outcomes in the treatment of gestational diabetes in Canada, 2009-2014. *Diabet Med* 2017;**34**:1296-302. doi:10.1111/dme.13394.
10. Shah BR, Chiu M, Amin S, et al. Surname lists to identify South Asian and Chinese ethnicity from secondary data in Ontario, Canada: a validation study. *BMC Med Res Methodol* 2010;**10**:42. doi:10.1186/1471-2288-10-42.

- 1  
2  
3 11. Quan H, Wang F, Schopflocher D, et al. Development and validation of a surname list to define  
4 Chinese ethnicity. *Med Care* 2006;**44**:328-33. doi:10.1097/01.mlr.0000204010.81331.a9.  
5  
6
- 7 12. Gunby J. Assisted reproductive technologies (ART) in Canada: 2012 results from the Canadian ART  
8 Register. Available at <https://cfas.ca/report-2012.html>. Accessed on March 21, 2022.  
9  
10
- 11 13. Statistics Canada. Trends in Canadian births, 1992 to 2012. Available at  
12 <https://www150.statcan.gc.ca/n1/pub/82-625-x/2016001/article/14314-eng.htm>. Accessed on March 21,  
13 2022.  
14  
15
- 16 14. Raguz N, McDonald SW, Metcalfe A, et al. Mental health outcomes of mothers who conceived using  
17 fertility treatment. *Reprod Health* 2014;**11**:19. doi:10.1186/1742-4755-11-19.  
18  
19
- 20 15. Sunderam S, Kissin DM, Zhang Y, et al. Assisted Reproductive Technology Surveillance - United  
21 States, 2016. *MMWR Surveill Summ* 2019;**68**:1-23. doi:10.15585/mmwr.ss6804a1.  
22  
23
- 24 16. Kessler LM, Craig BM, Plosker SM, et al. Infertility evaluation and treatment among women in the  
25 United States. *Fertil Steril* 2013;**100**:1025-32. doi:10.1016/j.fertnstert.2013.05.040.  
26  
27
- 28 17. Davies MJ, Moore VM, Willson KJ, et al. Reproductive technologies and the risk of birth defects. *N*  
29 *Engl J Med* 2012;**366**:1803-13. doi:10.1056/NEJMoa1008095.  
30  
31
- 32 18. Rimm AA, Katayama AC, Katayama KP. A meta-analysis of the impact of IVF and ICSI on major  
33 malformations after adjusting for the effect of subfertility. *J Assist Reprod Genet* 2011;**28**:699-705.  
34  
35  
36  
37  
38  
39  
40  
41  
42  
43  
44  
45  
46  
47  
48  
49  
50  
51  
52  
53  
54  
55  
56  
57  
58  
59  
60  
doi:10.1007/s10815-011-9583-z.
19. Stern JE, Luke B, Tobias M, et al. Adverse pregnancy and birth outcomes associated with underlying  
diagnosis with and without assisted reproductive technology treatment. *Fertil Steril* 2015;**103**:1438-45.  
doi:10.1016/j.fertnstert.2015.02.027.
20. Wennberg AL, Opdahl S, Bergh C, et al. Effect of maternal age on maternal and neonatal outcomes  
after assisted reproductive technology. *Fertil Steril* 2016;**106**:1142-9 e14.  
doi:10.1016/j.fertnstert.2016.06.021.

- 1  
2  
3 21. Leader J, Bajwa A, Lanes A, et al. The Effect of Very Advanced Maternal Age on Maternal and  
4 Neonatal Outcomes: A Systematic Review. *J Obstet Gynaecol Can* 2018;**40**:1208-18.  
5  
6 doi:10.1016/j.jogc.2017.10.027.  
7  
8  
9 22. Kousta E, White DM, Cela E, et al. The prevalence of polycystic ovaries in women with infertility.  
10  
11 *Hum Reprod* 1999;**14**:2720-3. doi:10.1093/humrep/14.11.2720.  
12  
13 23. Boomsma CM, Eijkemans MJ, Hughes EG, et al. A meta-analysis of pregnancy outcomes in women  
14  
15 with polycystic ovary syndrome. *Hum Reprod Update* 2006;**12**:673-83. doi:10.1093/humupd/dml036.  
16  
17  
18  
19  
20  
21  
22  
23  
24  
25  
26  
27  
28  
29  
30  
31  
32  
33  
34  
35  
36  
37  
38  
39  
40  
41  
42  
43  
44  
45  
46  
47  
48  
49  
50  
51  
52  
53  
54  
55  
56  
57  
58  
59  
60

Confidential

**Table 1.** Maternal characteristics according to ART group

| Characteristics                                      | Without ART               | With ART      | p      |
|------------------------------------------------------|---------------------------|---------------|--------|
| <b>Pregnancy, N</b>                                  | 263,169                   | 10,072        | --     |
| <b>Women, N</b>                                      | 203,391                   | 9168          | --     |
| <b>Children, N</b>                                   | 266,589                   | 11,258        | --     |
| <b>Primiparous N (%)</b>                             | 140,307(53.31%)           | 6325(62.8%)   | <0.001 |
| <b>Multiple Birth N (%)</b>                          | 3362(1.28%)               | 1144(11.36%)  | <0.001 |
| <b>Multiple Birth N (%), categories</b>              |                           |               |        |
| <b>Twins</b>                                         | 3304(1.26%)               | 1103 (10.95%) | <0.001 |
| <b>Triplets</b>                                      | 58(0.02%)                 | 40 (0.4%)     |        |
| <b>Quadruplets</b>                                   | 0(0%)                     | 1(0.01%)      |        |
| <b>Age at delivery, mean (SD), years</b>             | 29.21 (5.3)               | 33.44 (4.9)   | <0.001 |
| <b>Age at delivery, years</b>                        |                           |               |        |
| <b>&lt;25 N (%)</b>                                  | 51,053(19.4%)             | 312(3.1%)     | <0.001 |
| <b>25-30 N (%)</b>                                   | 84,715(32.19%)            | 1802(17.89%)  |        |
| <b>30-35 N (%)</b>                                   | 84,433(32.08%)            | 3790(37.63%)  |        |
| <b>&gt;35 N (%)</b>                                  | 42,968(16.33%)            | 4168(41.38%)  |        |
| <b>Ethnicity</b>                                     |                           |               |        |
| <b>General Population N (%)</b>                      | 168,120(93.02%)           | 7478(91.78%)  | <0.001 |
| <b>Chinese N (%)</b>                                 | 6667(3.69%)               | 354(4.34%)    |        |
| <b>South Asian N (%)</b>                             | 5944(3.29%)               | 316(3.88%)    |        |
| <b>Rural Residence at delivery N (%)</b>             | 43,559(16.55%)            | 1026(10.19%)  | <0.001 |
| <b>Married N (%)</b>                                 | 126,697(62.29%)           | 7265(79.24%)  | <0.001 |
| <b>Annual household income CAD,<br/>median (IQR)</b> | 58,618<br>(47,685-73,284) | 58,637        | 0.280  |



|                                                      |               |                     |        |
|------------------------------------------------------|---------------|---------------------|--------|
|                                                      |               | (48,039-<br>72,765) |        |
| <b>Pre-existing diabetes N (%)</b>                   | 2031(1%)      | 153(1.67%)          | <0.001 |
| <b>Pre-existing cardiovascular disease N (%)</b>     | 2209(1.09%)   | 130(1.42%)          | 0.003  |
| <b>Other pre-existing medical conditions * N (%)</b> | 6629 (3.26%)  | 328 (3.58%)         | 0.099  |
| <b>Gestational diabetes N (%)</b>                    | 18,906(7.18%) | 1110(11.02%)        | <0.001 |
| <b>Hypertensive disorders of pregnancy N (%)</b>     | 16,794(6.38%) | 945(9.38%)          | <0.001 |

\*Including chronic obstructive pulmonary disease, asthma, renal failure, liver disease, epilepsy, and lupus

**Table 2.** Obstetric and neonatal outcomes according to ART group

| Characteristics                                  | Without ART         | With ART            | p      |
|--------------------------------------------------|---------------------|---------------------|--------|
| <b>Spontaneous vaginal births, n (%)</b>         | 146,112 (54.8%)     | 4383 (38.9%)        | <0.001 |
| <b>Induced labor, n (%)</b>                      | 95,734 (35.9%)      | 4174 (37.1%)        | 0.012  |
| <b>C-section, n (%)</b>                          | 73,474 (27.6%)      | 4713 (41.9%)        | <0.001 |
| <b>Pre-term delivery (&lt;37 weeks), n (%)</b>   | 16,494(6.27%)       | 1691(16.79%)        | <0.001 |
| <b>Prolonged pregnancy (&gt;41 weeks), n (%)</b> | 687(0.26%)          | 13(0.13%)           | <0.001 |
| <b>Birth weight, g (SD)</b>                      | 3330.63<br>(579.68) | 3039.72<br>(778.14) | <0.001 |
| <b>Birth weight &lt;2.5 kg, n (%)</b>            | 13,353(5.07%)       | 1491(14.8%)         | <0.001 |
| <b>Birth weight 2.5-4.0 kg, n (%)</b>            | 177,416(67.42%)     | 6436(63.9%)         | <0.001 |
| <b>Birth weight &gt;4.0 kg, n (%)</b>            | 22,160(8.42%)       | 629(6.25%)          | <0.001 |
| <i>Neonatal ICU stay</i>                         |                     |                     |        |
| <b>Yes, n (%)</b>                                | 42,156 (15.8%)      | 3128 (27.8%)        | <0.001 |
| <b>Congenital anomalies</b>                      | 1139 (0.43%)        | 49 (0.49%)          | 0.466  |

**Table 3.** Maternal characteristics according to ART group and maternal age at delivery

| Characteristics       | Without ART |         |         |         |                | With ART |          |          |          |                 |
|-----------------------|-------------|---------|---------|---------|----------------|----------|----------|----------|----------|-----------------|
|                       | <25         | 25-30   | 30-35   | >35     | Total          | <25      | 25-30    | 30-35    | >35      | Total           |
| <b>Pregnancy, N</b>   | 51,053      | 84,715  | 84,433  | 42,968  | <b>263,169</b> | 312      | 1802     | 3790     | 4168     | <b>10,072</b>   |
|                       | (99.4%)     | (97.9%) | (95.7%) | (91.2%) |                | (0.61%)  | (2.1%)   | (4.3%)   | (8.8%)   |                 |
| <b>Children, N</b>    | 51,522      | 85,745  | 85,661  | 43,661  | <b>266,589</b> | 329      | 1993     | 4254     | 4682     | <b>11,258</b>   |
|                       | (99.4%)     | (97.7%) | (95.3%) | (90.3%) |                | (0.6%)   | (2.3%)   | (4.7%)   | (9.7%)   |                 |
| <b>Primiparous N</b>  | 33,695      | 46,473  | 39,898  | 20,241  | <b>140,307</b> | 224      | 1216     | 2366     | 519      | <b>6325</b>     |
| <b>(%)</b>            | (66.0%)     | (54.9%) | (47.3%) | (47.1%) | <b>(53.3%)</b> | (71.8%)  | (67.5%)  | (62.4%)  | (60.4%)  | <b>(62.8%)</b>  |
| <b>Multiple Birth</b> | 460         | 1014    | 1204    | 684     | <b>3362</b>    | 16       | 181      | 449      | 498      | <b>1144</b>     |
| <b>N (%)</b>          | (0.9%)      | (1.2%)  | (1.43%) | (1.59%) | <b>(1.28%)</b> | (5.13%)  | (10.04%) | (11.85%) | (11.95%) | <b>(11.36%)</b> |
| <b>Multiple Birth</b> |             |         |         |         |                |          |          |          |          |                 |
| <b>N (%),</b>         |             |         |         |         |                |          |          |          |          |                 |
| <b>categories</b>     |             |         |         |         |                |          |          |          |          |                 |
| <b>Twins</b>          | 451         | 998     | 1180    | 675     | <b>3304</b>    | 15       | 172      | 434      | 482      | <b>1103</b>     |
|                       | (0.88%)     | (1.18%) | (1.4%)  | (1.57%) | <b>(1.26%)</b> | (4.81%)  | (9.54%)  | (11.45%) | (11.56%) | <b>(10.95%)</b> |
| <b>Triplets</b>       | 9           | 16      | 24      | 9       | <b>58</b>      | 1        | 8        | 15       | 16       | <b>40</b>       |
|                       | (0.02%)     | (0.02%) | (0.03%) | (0.02%) | <b>(0.02%)</b> | (0.32%)  | (0.44%)  | (0.4%)   | (0.38%)  | <b>(0.4%)</b>   |

1  
2  
3  
4  
5  
6  
7  
8  
9  
10  
11  
12  
13  
14  
15  
16  
17  
18  
19  
20  
21  
22  
23  
24  
25  
26  
27  
28  
29  
30  
31  
32  
33  
34  
35  
36  
37  
38  
39  
40  
41  
42  
43  
44  
45  
46  
47

|                                                  |                    |                   |                    |                  |                                  |                |                 |                 |                 |                                |
|--------------------------------------------------|--------------------|-------------------|--------------------|------------------|----------------------------------|----------------|-----------------|-----------------|-----------------|--------------------------------|
| <b>Quadruplets</b>                               | 0<br>(0%)          | 0<br>(0%)         | 0<br>(0%)          | 0<br>(0%)        | <b>0</b><br><b>(0%)</b>          | 0<br>(0%)      | 1<br>(0.06%)    | 0<br>(0%)       | 0<br>(0%)       | <b>1</b><br><b>(0.01%)</b>     |
| <b>Age at delivery, mean (SD), years</b>         | 21.48<br>(2.2)     | 27.20<br>(1.4)    | 31.79<br>(1.4)     | 37.25<br>(2.2)   | <b>29.21 (5.3)</b>               | 22.36<br>(1.8) | 27.52<br>(1.3)  | 32.10<br>(1.4)  | 38.10<br>(2.8)  | <b>33.44 (4.9)</b>             |
| <b>Rural Residence at delivery N (%)</b>         | 13,908<br>(27.24%) | 14,743<br>(17.4%) | 10,264<br>(12.16%) | 4644<br>(10.81%) | <b>43,559</b><br><b>(16.55%)</b> | 71<br>(22.76%) | 281<br>(15.59%) | 368<br>(9.71%)  | 306<br>(7.34%)  | <b>1026</b><br><b>(10.19%)</b> |
| <b>Gestational diabetes N (%)</b>                | 1660<br>(3.25%)    | 4648<br>(5.49%)   | 6958<br>(8.24%)    | 5640<br>(13.13%) | <b>18,906</b><br><b>(7.18%)</b>  | 22<br>(7.05%)  | 129<br>(7.16%)  | 396<br>(10.45%) | 563<br>(13.51%) | <b>1110</b><br><b>(11.02%)</b> |
| <b>Hypertensive disorders of pregnancy N (%)</b> | 3013<br>(5.9%)     | 5225<br>(6.17%)   | 5401<br>(6.4%)     | 3155<br>(7.34%)  | <b>16,794</b><br><b>(6.38%)</b>  | 13<br>(4.17%)  | 162<br>(8.99%)  | 311<br>(8.21%)  | 459<br>(11.01%) | <b>945</b><br><b>(9.38%)</b>   |

\*Including chronic obstructive pulmonary disease, asthma, renal failure, liver disease, epilepsy, and lupus

**Table 4.** Obstetric and neonatal outcomes by ART group and maternal age at delivery

| Characteristics                                  | Without ART       |                   |                   |                   |                                  | With ART       |                 |                 |                 |                                |
|--------------------------------------------------|-------------------|-------------------|-------------------|-------------------|----------------------------------|----------------|-----------------|-----------------|-----------------|--------------------------------|
|                                                  | <25               | 25-30             | 30-35             | >35               | Total                            | <25            | 25-30           | 30-35           | >35             | Total                          |
| <b>Spontaneous vaginal births, n (%)</b>         | 30,364<br>(58.9%) | 48,873<br>(57.0%) | 46,382<br>(54.1%) | 20,493<br>(46.9%) | <b>146,112</b><br><b>(54.8%)</b> | 181<br>(55.0%) | 942<br>(47.3%)  | 1734<br>(40.8%) | 1526<br>(32.6%) | <b>4383</b><br><b>(38.9%)</b>  |
| <b>Induced labor, n (%)</b>                      | 17,957<br>(34.9%) | 31,202<br>(36.4%) | 30,708<br>(35.8%) | 15,867<br>(36.3%) | <b>95,734</b><br><b>(35.9%)</b>  | 96<br>(29.2%)  | 742<br>(37.2%)  | 1518<br>(35.7%) | 1818<br>(38.8%) | <b>4174</b><br><b>(37.1%)</b>  |
| <b>C-section, n (%)</b>                          | 10,814<br>(21.0%) | 21,700<br>(25.3%) | 25,488<br>(29.8%) | 15,472<br>(35.4%) | <b>73,474</b><br><b>(27.6%)</b>  | 84<br>(25.5%)  | 667<br>(33.5%)  | 1712<br>(40.2%) | 2250<br>(48.1%) | <b>4713</b><br><b>(41.9%)</b>  |
| <b>Pre-term delivery (&lt;37 weeks), n (%)</b>   | 3084<br>(6.04%)   | 4996<br>(5.9%)    | 5201<br>(6.16%)   | 3213<br>(7.48%)   | <b>16,494</b><br><b>(6.27%)</b>  | 68<br>(21.79%) | 307<br>(17.04%) | 620<br>(16.36%) | 696<br>(16.7%)  | <b>1691</b><br><b>(16.79%)</b> |
| <b>Prolonged pregnancy (&gt;41 weeks), n (%)</b> | 147<br>(0.29%)    | 184<br>(0.22%)    | 223<br>(0.26%)    | 133<br>(0.31%)    | <b>687</b><br><b>(0.26%)</b>     | 0<br>(0%)      | 1<br>(0.06%)    | 5<br>(0.13%)    | 7<br>(0.17%)    | <b>13</b><br><b>(0.13%)</b>    |

1  
2  
3  
4  
5  
6  
7  
8  
9  
10  
11  
12  
13  
14  
15  
16  
17  
18  
19  
20  
21  
22  
23  
24  
25  
26  
27  
28  
29  
30  
31  
32  
33  
34  
35  
36  
37  
38  
39  
40  
41  
42  
43  
44  
45  
46  
47

|                          |          |          |          |          |                 |          |          |          |          |                 |
|--------------------------|----------|----------|----------|----------|-----------------|----------|----------|----------|----------|-----------------|
| <b>Birth weight, g</b>   | 3343     | 3351.63  | 3339.77  | 3306.47  | <b>3330.63</b>  | 2916.47  | 3070.63  | 3062.4   | 3040.7   | <b>3039.72</b>  |
| <b>(SD)</b>              | (574.39) | (566.91) | (572.65) | (600.13) | <b>(579.68)</b> | (840.13) | (783.37) | (776.36) | (770.35) | <b>(778.14)</b> |
| <b>Birth weight</b>      | 2515     | 3887     | 4262     | 2689     | <b>13,353</b>   | 53       | 264      | 554      | 620      | <b>1491</b>     |
| <b>&lt;2.5 kg, n (%)</b> | (4.93%)  | (4.59%)  | (5.05%)  | (6.26%)  | <b>(5.07%)</b>  | (16.99%) | (14.65%) | (14.62%) | (14.88%) | <b>(14.8%)</b>  |
| <b>Birth weight</b>      | 32,914   | 55,929   | 57,962   | 30,611   | <b>177,416</b>  | 179      | 1084     | 2386     | 2787     | <b>6436</b>     |
| <b>2.5-4.0 kg, n (%)</b> | (64.47%) | (66.02%) | (68.65%) | (71.24%) | <b>(67.42%)</b> | (57.37%) | (60.16%) | (62.96%) | (66.87%) | <b>(63.9%)</b>  |
| <b>Birth weight</b>      | 4202     | 7118     | 7229     | 3611     | <b>22,160</b>   | 13       | 107      | 251      | 258      | <b>629</b>      |
| <b>&gt;4.0 kg, n (%)</b> | (8.23%)  | (8.4%)   | (8.56%)  | (8.4%)   | <b>(8.42%)</b>  | (4.17%)  | (5.94%)  | (6.62%)  | (6.19%)  | <b>(6.25%)</b>  |
| <b>Neonatal ICU</b>      | 7870     | 13,191   | 13,657   | 7438     | <b>42,156</b>   | 99       | 579      | 1182     | 1268     | <b>3128</b>     |
| <b>stay, n (%)</b>       | (15.3%)  | (15.4%)  | (15.9%)  | (17.0%)  | <b>(15.8%)</b>  | (30.1%)  | (29.1%)  | (27.8%)  | (27.1%)  | <b>(27.8%)</b>  |
| <b>Congenital</b>        | 276      | 390      | 310      | 163      | <b>1139</b>     | 1        | 6        | 20       | 22       | <b>49</b>       |
| <b>anomalies</b>         | (0.54%)  | (0.46%)  | (0.37%)  | (0.38%)  | <b>(0.43%)</b>  | (0.32%)  | (0.33%)  | (0.53%)  | (0.53%)  | <b>(0.49%)</b>  |

## Figure Legends

**Figure 1.** Flow diagram of cohort selection.

**Figure 2.** Number of mothers giving birth to a live offspring following ART treatment and incidence of ART pregnancies leading to live births per 1000 pregnancies in Alberta July 1, 2009 – December 31, 2014. The increase in ART live births per year was 3.12 per 1000 pregnancies (0.31%, 95%CI: 0.28%-0.24%,  $p<0.001$ ).

**Figure 3.** Number of mothers giving birth to live offspring following ART treatment according to maternal age groups at the time of delivery July 1, 2009 – December 31, 2014 in Alberta. The annual increase in babies born following ART was 1.27 (0.13%; 95%CI: 0.08%, 0.17%;  $p=0.005$ ), 1.72 (0.17%; 95%CI: 0.11%, 0.23%;  $p=0.004$ ), 2.96 (0.30%; 95% CI: 0.24%, 0.35%;  $p<0.001$ ) and 4.44 (0.34%; 95%CI: 0.34%, 0.55%;  $p=0.001$ ) per 1000 pregnancies for mothers <25, 25-30, 30-35, and >35 years of age, respectively.

1  
2  
3  
4  
5  
6  
7  
8  
9  
10  
11  
12  
13  
14  
15  
16  
17  
18  
19  
20  
21  
22  
23  
24  
25  
26  
27  
28  
29  
30  
31  
32  
33  
34  
35  
36  
37  
38  
39  
40  
41  
42  
43  
44  
45  
46  
47  
48  
49  
50  
51  
52  
53  
54  
55  
56  
57  
58  
59  
60

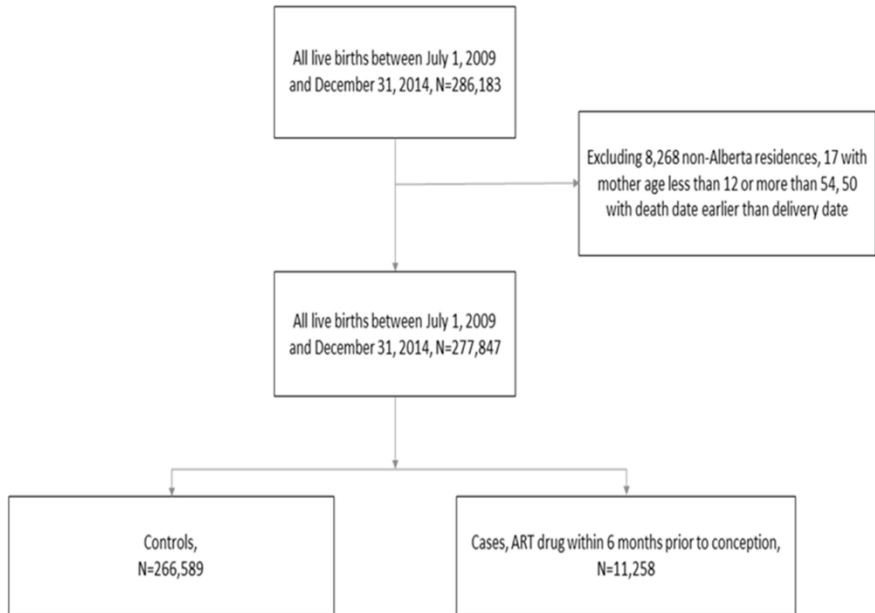

Figure 1. Flow diagram of cohort selection.

254x190mm (300 x 300 DPI)



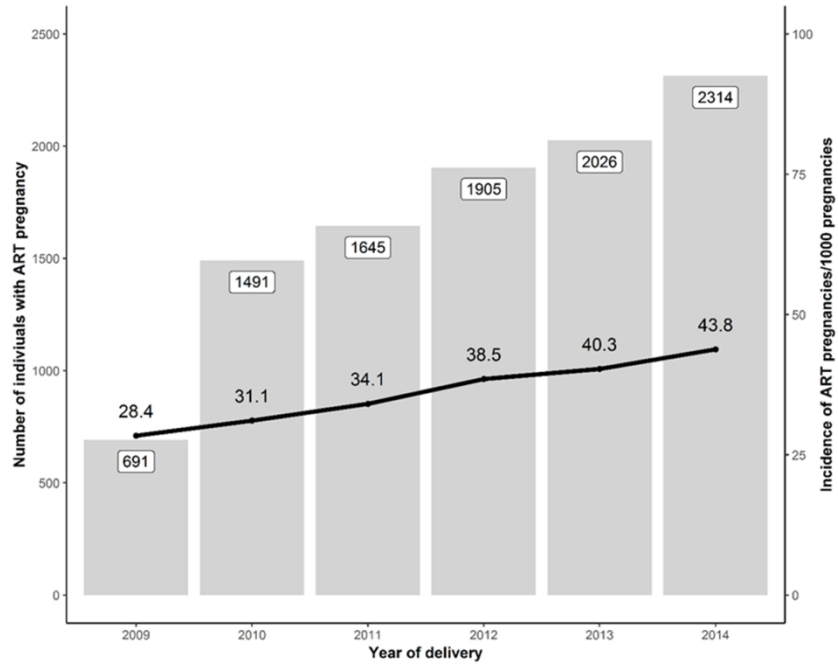

Figure 2. Number of mothers giving birth to a live offspring following ART treatment and incidence of ART pregnancies leading to live births per 1000 pregnancies in Alberta July 1, 2009 – December 31, 2014. The increase in ART live births per year was 3.12 per 1000 pregnancies (0.31%, 95%CI: 0.28%-0.24%,  $p < 0.001$ ).

254x190mm (300 x 300 DPI)

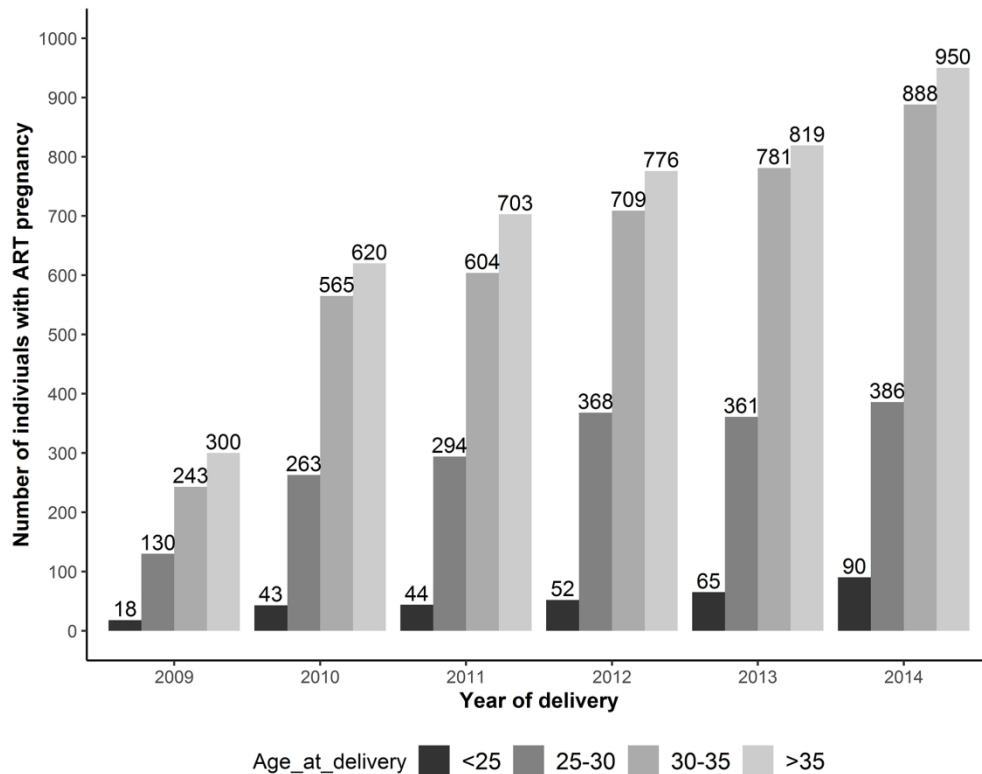

Figure 3. Number of mothers giving birth to live offspring following ART treatment according to maternal age groups at the time of delivery July 1, 2009 – December 31, 2014 in Alberta. The annual increase in babies born following ART was 1.27 (0.13%; 95%CI: 0.08%, 0.17%;  $p=0.005$ ), 1.72 (0.17%; 95%CI: 0.11%, 0.23%;  $p=0.004$ ), 2.96 (0.30%; 95% CI: 0.24%, 0.35%;  $p<0.001$ ) and 4.44 (0.34%; 95%CI: 0.34%, 0.55%;  $p=0.001$ ) per 1000 pregnancies for mothers <25, 25-30, 30-35, and >35 years of age, respectively.

181x145mm (300 x 300 DPI)

Supplementary Table S1. Drugs used to find ART cases in PIN dataset

| <b>Drug Name</b>                  | <b>DIN</b> | <b>ATC</b> |
|-----------------------------------|------------|------------|
| Clomid/ Clomifene                 | 02091879   | G03GB02    |
|                                   | 00018031   |            |
| Repronex/ Menopur                 | 02247790   | G03GA02    |
|                                   | 02283093   |            |
| Ovidrel/ choriogonadotropin alpha | 02262088   | G03GA08    |
|                                   | 02371588   |            |
| Bravelle/ Urofollitropin          | 02268140   | G03GA04    |
| Gonal-F/ follitropin alfa         | 02231464   | G03GA05    |
|                                   | 02231465   |            |
|                                   | 02243004   |            |
|                                   | 02244787   |            |
|                                   | 02248154   |            |
| Puregon/ Follitropin beta         | 02242439   | G03GA06    |
|                                   | 02242441   |            |
|                                   | 02243948   |            |
|                                   | 02243949   |            |
|                                   | 02231656   |            |
|                                   | 02231655   |            |
| Oreglutran/ Ganirelix             | 02245641   | H01CC01    |
| Cetrotide/ Cetrorelix             | 02247766   | H01CC02    |
|                                   | 02247767   |            |
| Crinone/ Progesterone             | 02241013   | G03DA04    |
| Endometrin/ Progesterone          | 02334992   | G03DA04    |
| Femara/ Letrozole                 | 02231384   | L02BG04    |

1  
2  
3  
4  
5  
6  
7  
8  
9  
10  
11  
12  
13  
14  
15  
16  
17  
18  
19  
20  
21  
22  
23  
24  
25  
26  
27  
28  
29  
30  
31  
32  
33  
34  
35  
36  
37  
38  
39  
40  
41  
42  
43  
44  
45  
46  
47  
48  
49  
50  
51  
52  
53  
54  
55  
56  
57  
58  
59  
60

Supplementary Table S2. ICD-9 and ICD-10 codes used to identify ART cases in ambulatory care, inpatient hospital separations, and practitioner claims databases.

| ICD 10                                             | ICD 9                                                                    |
|----------------------------------------------------|--------------------------------------------------------------------------|
| <b>Z31.1:</b> Artificial insemination              | <b>V26.1:</b> Artificial insemination                                    |
| <b>Z31.2:</b> In vitro fertilization               | <b>V23.85:</b> Pregnancy resulting from assisted reproductive technology |
| <b>Z31.3:</b> Other assisted fertilization methods |                                                                          |

Confidential

Supplementary Table S3. ICD codes for medical conditions in the mother (pre-existing and gestational)

| Conditions                                                                      | ICD 10 codes                       | ICD 9 codes            | Procedure |
|---------------------------------------------------------------------------------|------------------------------------|------------------------|-----------|
| CHD                                                                             | 745-747                            | Q20-Q28                |           |
| Preeclampsia                                                                    | O14                                | 642.4, 642.5           |           |
| HELLP syndrome                                                                  | O14.2                              | 642.53                 |           |
| Eclampsia                                                                       | O15                                | 642.6                  |           |
| Preeclampsia/eclampsia superimposed on pre-existing hypertension                | O11<br>(superimposed preeclampsia) | 642.7                  |           |
| Hypertension                                                                    | I10-I15                            | 401-405                |           |
| Pre-existing hypertension complicating pregnancy, childbirth and the puerperium | O10                                | 642.0,<br>642.1, 642.2 |           |
| Unspecified maternal hypertension                                               | O16                                | 642.9                  |           |
| Gestational hypertension                                                        | O13                                | 642.3                  |           |
| Postpartum hemorrhage                                                           | O72                                | 666                    |           |
| Placental abruption                                                             | O45                                | 641.2                  |           |
| Nutritional anemia                                                              | D50-D53                            | 280, 281               |           |
| Cardiac arrest                                                                  | I46                                | 427.5                  |           |
| following C/S or other obstetric surgery or procedures, including delivery NOS  | O75.4                              |                        |           |
| Following abortion or ectopic or molar pregnancy                                | O08.8                              |                        |           |
| Heart failure                                                                   | I50                                | 428                    |           |
| following C/S or other obstetric surgery or procedures, including delivery NOS  | O75.4                              |                        |           |
| Following abortion or ectopic or molar pregnancy                                | O08.8                              |                        |           |
| Cardiomyopathy in puerperium                                                    | O90.3                              |                        |           |

|                                                                                      |                                             |                                                 |                                                                     |
|--------------------------------------------------------------------------------------|---------------------------------------------|-------------------------------------------------|---------------------------------------------------------------------|
| Diseases of the circulatory system complicating pregnancy, childbirth and puerperium | O99.4                                       | 648.6                                           |                                                                     |
| Acute pulmonary oedema                                                               | J81                                         | 518.4                                           |                                                                     |
| Heart Failure/ Peripartum cardiomyopathy                                             | I50, J81, O08.8, O75.4, O90.3, O99.4        |                                                 |                                                                     |
| Cerebrovascular disease                                                              | G45, G46, H34, I60-I69                      | 430-438                                         | 1.JE.xx,<br>1.JJ.xx,<br>1.JK.xx,<br>1.JW.xx,<br>1.JX.xx             |
| Peripheral artery disease                                                            | I70, I71, I72, I73, I74, I77, I79, K55, Z95 | 440, 441, 442, 443, 444, 447, 557, 785.4, V34.4 | 1.KG.xx,<br>1.KA.xx<br>1.KE.xx,<br>1.KT.xx,<br>1.xx.93              |
| Coronary artery disease                                                              | I20, I21, I22, I23, I24                     | 410, 411, 412, 413, 429.6                       | 1.IJ.50,<br>1.IJ.76,<br>1.IJ.55,<br>1.IJ.57,<br>1.IJ.26,<br>3.IP.10 |
| Anemia                                                                               | D50, D53.9, D64.9, D62.0                    | 280-289                                         |                                                                     |
| Anemia complicating pregnancy, childbirth and the puerperium                         | O99.0                                       | 648.2                                           |                                                                     |
| Diabetes                                                                             | E10-E14                                     | 250                                             |                                                                     |

|                                    |                                                                                                 |                               |  |
|------------------------------------|-------------------------------------------------------------------------------------------------|-------------------------------|--|
| Pre-existing diabetes in pregnancy | O24.0-O24.3,<br>O24.5-O24.7,<br>O24.9                                                           | 648.0                         |  |
| Gestational diabetes               | O24.4, O24.8                                                                                    | 648.8                         |  |
| Lupus                              | M32                                                                                             | 7100                          |  |
| Renal disease                      | I210, I131,<br>N03.2-N03.7,<br>N05.2-N05.7,<br>N18, N19, N25.0,<br>Z49.0-Z49.2,<br>Z94.0, Z99.2 | 582, 583,<br>585, 586,<br>588 |  |

Supplementary Table S4. ICD codes for congenital abnormalities in the child

| Conditions                                                                                                                    | ICD 10 codes                               | ICD 9 codes |
|-------------------------------------------------------------------------------------------------------------------------------|--------------------------------------------|-------------|
| <b>Congenital anomalies in child</b>                                                                                          |                                            |             |
| Congenital heart disease                                                                                                      | Q20-Q28                                    | 745-747     |
| Anencephaly/Acrania                                                                                                           | Q00.0                                      | 740.0       |
| Transposition of great vessels                                                                                                | Q20.1, Q20.3,<br>Q20.5, Q20.8              | 745.1X      |
| Hypoplastic left heart syndrome:                                                                                              | Q23.04                                     | 746.7       |
| Renal agenesis and dysgenesis                                                                                                 | Q60.2, Q60.5                               | 753.0       |
| Anomalies of diaphragm: Absence of diaphragm, Congenital hernia: diaphragmatic, foramen of Morgagni, Eventration of diaphragm | Q79.0, Q79.1                               | 756.6       |
| Patau's syndrome                                                                                                              | Q91.7                                      | 758.1       |
| Edward's syndrome                                                                                                             | Q91.3                                      | 758.2       |
| Tetralogy of Fallot                                                                                                           | Q21.3                                      | 745.2       |
| Common ventricle                                                                                                              | Q20.4                                      | 745.3       |
| Endocardial cushion defects                                                                                                   | Q21.2                                      | 745.6X      |
| Anomalies of pulmonary valve congenital                                                                                       | Q22.0-3                                    | 746.0X      |
| Other specified congenital anomalies of heart                                                                                 | Q24.0-6, Q24.8                             | 746.8X      |
| Patent ductus arteriosus                                                                                                      | Q25.0                                      | 747.0       |
| Coarctation of aorta (preductal) (postductal)                                                                                 | Q25.1                                      | 747.10      |
| Anomalies of pulmonary artery                                                                                                 | Q25.5, Q25.6,<br>Q25.71, Q25.72,<br>Q25.79 | 747.3       |
| Agenesis, hypoplasia, and dysplasia of lung                                                                                   | Q33.2, Q33.3,<br>Q33.6                     | 748.5       |



|                                                                                    |                         |           |
|------------------------------------------------------------------------------------|-------------------------|-----------|
| Tracheoesophageal fistula, esophageal atresia and stenosis                         | Q39.0-4                 | 750.3     |
| Atresia and stenosis of small intestine                                            | Q41.9                   | 751.1     |
| Atresia and stenosis of large intestine, rectum, and anal canal                    | Q42.9                   | 751.2     |
| Congenital single renal cyst                                                       | Q61.01                  | 753.11    |
| Polycystic kidney                                                                  | Q61.2, Q61.3, Q61.19    | 753.12-14 |
| Renal dysplasia                                                                    | Q61.4                   | 753.15    |
| Other specified cystic kidney disease                                              | Q61.8                   | 753.19    |
| Anomalies of abdominal wall                                                        | Q79.2-4, Q79.51, Q79.59 | 756.7     |
| Other conditions due to autosomal anomalies:<br>Accessory autosomes NEC, Triploidy | Q92.7                   | 758.5     |

# Reporting checklist for cohort study.

Based on the STROBE cohort guidelines.

|                           |                     |                                                                                                                                 | Page   |
|---------------------------|---------------------|---------------------------------------------------------------------------------------------------------------------------------|--------|
|                           |                     | Reporting Item                                                                                                                  | Number |
| <b>Title and abstract</b> |                     |                                                                                                                                 |        |
| Title                     | <a href="#">#1a</a> | Indicate the study's design with a commonly used term in the title or the abstract                                              | 1      |
| Abstract                  | <a href="#">#1b</a> | Provide in the abstract an informative and balanced summary of what was done and what was found                                 | 3      |
| <b>Introduction</b>       |                     |                                                                                                                                 |        |
| Background / rationale    | <a href="#">#2</a>  | Explain the scientific background and rationale for the investigation being reported                                            | 4      |
| Objectives                | <a href="#">#3</a>  | State specific objectives, including any prespecified hypotheses                                                                | 4      |
| <b>Methods</b>            |                     |                                                                                                                                 |        |
| Study design              | <a href="#">#4</a>  | Present key elements of study design early in the paper                                                                         | 4      |
| Setting                   | <a href="#">#5</a>  | Describe the setting, locations, and relevant dates, including periods of recruitment, exposure, follow-up, and data collection | 5-6    |

|    |                      |                      |                                                                 |     |
|----|----------------------|----------------------|-----------------------------------------------------------------|-----|
| 1  | Eligibility criteria | <a href="#">#6a</a>  | Give the eligibility criteria, and the sources and methods of   | 5-6 |
| 2  |                      |                      | selection of participants. Describe methods of follow-up.       |     |
| 3  |                      |                      |                                                                 |     |
| 4  |                      |                      |                                                                 |     |
| 5  |                      |                      |                                                                 |     |
| 6  | Eligibility criteria | <a href="#">#6b</a>  | For matched studies, give matching criteria and number of       |     |
| 7  |                      |                      | exposed and unexposed                                           |     |
| 8  |                      |                      |                                                                 |     |
| 9  |                      |                      |                                                                 |     |
| 10 |                      |                      |                                                                 |     |
| 11 | Variables            | <a href="#">#7</a>   | Clearly define all outcomes, exposures, predictors, potential   | 5-6 |
| 12 |                      |                      | confounders, and effect modifiers. Give diagnostic criteria, if |     |
| 13 |                      |                      | applicable                                                      |     |
| 14 |                      |                      |                                                                 |     |
| 15 |                      |                      |                                                                 |     |
| 16 |                      |                      |                                                                 |     |
| 17 |                      |                      |                                                                 |     |
| 18 |                      |                      |                                                                 |     |
| 19 | Data sources /       | <a href="#">#8</a>   | For each variable of interest give sources of data and details  | 5-6 |
| 20 | measurement          |                      | of methods of assessment (measurement). Describe                |     |
| 21 |                      |                      | comparability of assessment methods if there is more than       |     |
| 22 |                      |                      | one group. Give information separately for for exposed and      |     |
| 23 |                      |                      | unexposed groups if applicable.                                 |     |
| 24 |                      |                      |                                                                 |     |
| 25 |                      |                      |                                                                 |     |
| 26 |                      |                      |                                                                 |     |
| 27 |                      |                      |                                                                 |     |
| 28 |                      |                      |                                                                 |     |
| 29 |                      |                      |                                                                 |     |
| 30 |                      |                      |                                                                 |     |
| 31 | Bias                 | <a href="#">#9</a>   | Describe any efforts to address potential sources of bias       | 6   |
| 32 |                      |                      |                                                                 |     |
| 33 |                      |                      |                                                                 |     |
| 34 |                      |                      |                                                                 |     |
| 35 | Study size           | <a href="#">#10</a>  | Explain how the study size was arrived at                       | 5   |
| 36 |                      |                      |                                                                 |     |
| 37 |                      |                      |                                                                 |     |
| 38 | Quantitative         | <a href="#">#11</a>  | Explain how quantitative variables were handled in the          | 6   |
| 39 | variables            |                      | analyses. If applicable, describe which groupings were          |     |
| 40 |                      |                      | chosen, and why                                                 |     |
| 41 |                      |                      |                                                                 |     |
| 42 |                      |                      |                                                                 |     |
| 43 |                      |                      |                                                                 |     |
| 44 |                      |                      |                                                                 |     |
| 45 | Statistical          | <a href="#">#12a</a> | Describe all statistical methods, including those used to       | 6   |
| 46 | methods              |                      | control for confounding                                         |     |
| 47 |                      |                      |                                                                 |     |
| 48 |                      |                      |                                                                 |     |
| 49 |                      |                      |                                                                 |     |
| 50 |                      |                      |                                                                 |     |
| 51 |                      |                      |                                                                 |     |
| 52 |                      |                      |                                                                 |     |
| 53 |                      |                      |                                                                 |     |
| 54 | Statistical          | <a href="#">#12b</a> | Describe any methods used to examine subgroups and              | 6   |
| 55 | methods              |                      | interactions                                                    |     |
| 56 |                      |                      |                                                                 |     |
| 57 |                      |                      |                                                                 |     |
| 58 |                      |                      |                                                                 |     |
| 59 |                      |                      |                                                                 |     |
| 60 |                      |                      |                                                                 |     |

|    |                  |                      |                                                               |   |
|----|------------------|----------------------|---------------------------------------------------------------|---|
| 1  | Statistical      | <a href="#">#12c</a> | Explain how missing data were addressed                       | 6 |
| 2  |                  |                      |                                                               |   |
| 3  | methods          |                      |                                                               |   |
| 4  |                  |                      |                                                               |   |
| 5  |                  |                      |                                                               |   |
| 6  | Statistical      | <a href="#">#12d</a> | If applicable, explain how loss to follow-up was addressed    | 6 |
| 7  |                  |                      |                                                               |   |
| 8  | methods          |                      |                                                               |   |
| 9  |                  |                      |                                                               |   |
| 10 |                  |                      |                                                               |   |
| 11 | Statistical      | <a href="#">#12e</a> | Describe any sensitivity analyses                             | 6 |
| 12 |                  |                      |                                                               |   |
| 13 | methods          |                      |                                                               |   |
| 14 |                  |                      |                                                               |   |
| 15 |                  |                      |                                                               |   |
| 16 |                  |                      |                                                               |   |
| 17 |                  |                      |                                                               |   |
| 18 |                  |                      |                                                               |   |
| 19 |                  |                      |                                                               |   |
| 20 | <b>Results</b>   |                      |                                                               |   |
| 21 |                  |                      |                                                               |   |
| 22 |                  |                      |                                                               |   |
| 23 | Participants     | <a href="#">#13a</a> | Report numbers of individuals at each stage of study—eg       | 6 |
| 24 |                  |                      | numbers potentially eligible, examined for eligibility,       |   |
| 25 |                  |                      | confirmed eligible, included in the study, completing follow- |   |
| 26 |                  |                      | up, and analysed. Give information separately for for         |   |
| 27 |                  |                      | exposed and unexposed groups if applicable.                   |   |
| 28 |                  |                      |                                                               |   |
| 29 |                  |                      |                                                               |   |
| 30 |                  |                      |                                                               |   |
| 31 |                  |                      |                                                               |   |
| 32 |                  |                      |                                                               |   |
| 33 |                  |                      |                                                               |   |
| 34 |                  |                      |                                                               |   |
| 35 | Participants     | <a href="#">#13b</a> | Give reasons for non-participation at each stage              | 6 |
| 36 |                  |                      |                                                               |   |
| 37 |                  |                      |                                                               |   |
| 38 | Participants     | <a href="#">#13c</a> | Consider use of a flow diagram                                | 6 |
| 39 |                  |                      |                                                               |   |
| 40 |                  |                      |                                                               |   |
| 41 |                  |                      |                                                               |   |
| 42 |                  |                      |                                                               |   |
| 43 |                  |                      |                                                               |   |
| 44 |                  |                      |                                                               |   |
| 45 | Descriptive data | <a href="#">#14a</a> | Give characteristics of study participants (eg demographic,   | 7 |
| 46 |                  |                      | clinical, social) and information on exposures and potential  |   |
| 47 |                  |                      | confounders. Give information separately for exposed and      |   |
| 48 |                  |                      | unexposed groups if applicable.                               |   |
| 49 |                  |                      |                                                               |   |
| 50 |                  |                      |                                                               |   |
| 51 |                  |                      |                                                               |   |
| 52 |                  |                      |                                                               |   |
| 53 |                  |                      |                                                               |   |
| 54 |                  |                      |                                                               |   |
| 55 | Descriptive data | <a href="#">#14b</a> | Indicate number of participants with missing data for each    | 6 |
| 56 |                  |                      | variable of interest                                          |   |
| 57 |                  |                      |                                                               |   |
| 58 |                  |                      |                                                               |   |
| 59 |                  |                      |                                                               |   |
| 60 |                  |                      |                                                               |   |

|    |                   |                      |                                                                   |
|----|-------------------|----------------------|-------------------------------------------------------------------|
| 1  |                   |                      |                                                                   |
| 2  |                   |                      |                                                                   |
| 3  |                   |                      |                                                                   |
| 4  | Descriptive data  | <a href="#">#14c</a> | Summarise follow-up time (eg, average and total amount)           |
| 5  |                   |                      |                                                                   |
| 6  |                   |                      |                                                                   |
| 7  |                   |                      |                                                                   |
| 8  |                   |                      |                                                                   |
| 9  |                   |                      |                                                                   |
| 10 | Outcome data      | <a href="#">#15</a>  | Report numbers of outcome events or summary measures              |
| 11 |                   |                      | over time. Give information separately for exposed and            |
| 12 |                   |                      | unexposed groups if applicable.                                   |
| 13 |                   |                      |                                                                   |
| 14 |                   |                      |                                                                   |
| 15 |                   |                      |                                                                   |
| 16 |                   |                      |                                                                   |
| 17 |                   |                      |                                                                   |
| 18 |                   |                      |                                                                   |
| 19 |                   |                      |                                                                   |
| 20 |                   |                      |                                                                   |
| 21 | Main results      | <a href="#">#16a</a> | Give unadjusted estimates and, if applicable, confounder-         |
| 22 |                   |                      | adjusted estimates and their precision (eg, 95% confidence        |
| 23 |                   |                      | interval). Make clear which confounders were adjusted for         |
| 24 |                   |                      | and why they were included                                        |
| 25 |                   |                      |                                                                   |
| 26 |                   |                      |                                                                   |
| 27 |                   |                      |                                                                   |
| 28 |                   |                      |                                                                   |
| 29 |                   |                      |                                                                   |
| 30 |                   |                      |                                                                   |
| 31 | Main results      | <a href="#">#16b</a> | Report category boundaries when continuous variables were         |
| 32 |                   |                      | categorized                                                       |
| 33 |                   |                      |                                                                   |
| 34 |                   |                      |                                                                   |
| 35 |                   |                      |                                                                   |
| 36 | Main results      | <a href="#">#16c</a> | If relevant, consider translating estimates of relative risk into |
| 37 |                   |                      | absolute risk for a meaningful time period                        |
| 38 |                   |                      |                                                                   |
| 39 |                   |                      |                                                                   |
| 40 |                   |                      |                                                                   |
| 41 |                   |                      |                                                                   |
| 42 |                   |                      |                                                                   |
| 43 |                   |                      |                                                                   |
| 44 |                   |                      |                                                                   |
| 45 | Other analyses    | <a href="#">#17</a>  | Report other analyses done—eg analyses of subgroups and           |
| 46 |                   |                      | interactions, and sensitivity analyses                            |
| 47 |                   |                      |                                                                   |
| 48 |                   |                      |                                                                   |
| 49 |                   |                      |                                                                   |
| 50 | <b>Discussion</b> |                      |                                                                   |
| 51 |                   |                      |                                                                   |
| 52 |                   |                      |                                                                   |
| 53 | Key results       | <a href="#">#18</a>  | Summarise key results with reference to study objectives          |
| 54 |                   |                      | 8                                                                 |
| 55 |                   |                      |                                                                   |
| 56 |                   |                      |                                                                   |
| 57 |                   |                      |                                                                   |
| 58 |                   |                      |                                                                   |
| 59 |                   |                      |                                                                   |
| 60 |                   |                      |                                                                   |

|    |                          |                     |                                                                |    |
|----|--------------------------|---------------------|----------------------------------------------------------------|----|
| 1  | Limitations              | <a href="#">#19</a> | Discuss limitations of the study, taking into account sources  | 10 |
| 2  |                          |                     |                                                                |    |
| 3  |                          |                     | of potential bias or imprecision. Discuss both direction and   |    |
| 4  |                          |                     |                                                                |    |
| 5  |                          |                     | magnitude of any potential bias.                               |    |
| 6  |                          |                     |                                                                |    |
| 7  |                          |                     |                                                                |    |
| 8  |                          |                     |                                                                |    |
| 9  | Interpretation           | <a href="#">#20</a> | Give a cautious overall interpretation considering objectives, | 10 |
| 10 |                          |                     |                                                                |    |
| 11 |                          |                     | limitations, multiplicity of analyses, results from similar    |    |
| 12 |                          |                     |                                                                |    |
| 13 |                          |                     | studies, and other relevant evidence.                          |    |
| 14 |                          |                     |                                                                |    |
| 15 |                          |                     |                                                                |    |
| 16 | Generalisability         | <a href="#">#21</a> | Discuss the generalisability (external validity) of the study  | 10 |
| 17 |                          |                     |                                                                |    |
| 18 |                          |                     | results                                                        |    |
| 19 |                          |                     |                                                                |    |
| 20 |                          |                     |                                                                |    |
| 21 |                          |                     |                                                                |    |
| 22 | <b>Other Information</b> |                     |                                                                |    |
| 23 |                          |                     |                                                                |    |
| 24 |                          |                     |                                                                |    |
| 25 | Funding                  | <a href="#">#22</a> | Give the source of funding and the role of the funders for the | 2  |
| 26 |                          |                     |                                                                |    |
| 27 |                          |                     | present study and, if applicable, for the original study on    |    |
| 28 |                          |                     |                                                                |    |
| 29 |                          |                     | which the present article is based                             |    |
| 30 |                          |                     |                                                                |    |
| 31 |                          |                     |                                                                |    |
| 32 |                          |                     |                                                                |    |
| 33 |                          |                     |                                                                |    |
| 34 |                          |                     |                                                                |    |
| 35 |                          |                     |                                                                |    |

36 None The STROBE checklist is distributed under the terms of the Creative Commons Attribution  
37 License CC-BY. This checklist can be completed online using <https://www.goodreports.org/>, a tool  
38 made by the [EQUATOR Network](#) in collaboration with [Penelope.ai](#)  
39  
40  
41  
42  
43  
44  
45  
46  
47  
48  
49  
50  
51  
52  
53  
54  
55  
56  
57  
58  
59  
60
